# Supplementary material for: Signals of vagal circuits engaging with AKT1 in α7 nAChR+CD11b+ cells lessen E. coli and LPS-induced acute inflammatory injury
Source: PubMed Central journal article supplement (PMC5419718; doi:10.1038/celldisc.2017.9), 2017-04-11

## Supplementary Figures

### Supplementary Figure 1

**Effect of vagotomy on spleen, blood and lung neutrophils, ELW, and phosphorylation of p65 NF- $\kappa$ B and AKT1 in splenic neutrophils in LPS-induced ALI.** Sham and vagotomized mice were IT challenged with LPS (5 mg/kg). 15 h after IT LPS, mice were killed to assess (A) neutrophils in the spleen; (B) blood neutrophils; (C) lung MPO (an index of lung neutrophil infiltration); ELW (D), and p-P65 NF- $\kappa$ B (E) and p-AKT1<sup>ser473</sup> levels (F) in splenic neutrophils. N = 4 in each group; \* $P < 0.05$ , Student's t test (A-B, D-F) and repeated measures two-way ANOVA was used for statistical analysis (C). Data are presented as mean  $\pm$  SD. Representative from two independent experiments.

### Supplementary Figure 2

**Identification of specificity of rabbit anti- $\alpha 7$  nAChR polyclonal antibody.** Lung, blood, and BM cells were isolated from wildtype and *Chrna7*<sup>-/-</sup> mice and labeled with Alexa Fluor® 488-rabbit anti- $\alpha 7$  nAChR antibody. The whole cell population was gated. Percentage of  $\alpha 7$  nAChR<sup>+</sup> cells was evaluated in lung (A-B), blood (C-D), and BM (E-F) cells. N = 3 in each group. Data are presented as mean  $\pm$  SD. Wildtype and *Chrna7*<sup>-/-</sup> BM cells were labeled with Fluor-633  $\alpha$ -bungarotoxin (Biotium) and the whole cells were gated. The  $\alpha 7$  nAChR<sup>+</sup> cells in the BM cells were calculated (G).

### Supplementary Figure 3

**A-F. Changes of monocytes (Ly6C<sup>hi</sup>Ly6G<sup>int</sup>) and neutrophils (Ly6C<sup>int</sup>Ly6G<sup>hi</sup>) in the spleen, BM, and lung from PBS-challenged sham and vagotomized mice.** Spleen, BM, and lung cells were isolated from sham + PBS (IT) and vagotomy + PBS (IT) mice at 24 h. The cells were labeled with fluorescent anti-Ly6C and Ly6G antibodies. The whole cell population was gated. Percentage of monocytes (Ly6C<sup>hi</sup>Ly6G<sup>int</sup>) and neutrophils (Ly6C<sup>int</sup>Ly6G<sup>hi</sup>) in the spleen (A-C), BM (D-F), and lung (G-I) were analyzed. N = 3 in each group. Data are presented as mean  $\pm$  SD.

**J. Changes of lung MPO, an index of neutrophil infiltration.** Sham and vagotomized (right cervical) wildtype mice were IT challenged with PBS and killed at 4, 12, and 24 h post PBS challenge. The lungs were excised and homogenized to measure MPO activity. N = 3 in each group. Data are presented as mean  $\pm$  SD.

#### Supplementary Figure 4

**Representative photomicrographs of lung histology in *E. coli* pneumonia compared sham to vagotomized mice.**

**(A) Effect of vagotomy on infiltration of neutrophils in *E. coli* infected lungs.** The sham and vagotomized mice were IT challenged with *E. coli*  $2.5 \times 10^6$  cfu and then sacrificed at 12 and 24 h. The lungs were collected for immunohistochemistry. Red color: stained with anti-VE-cadherin antibody for labeling blood vessels; green color: labeled with anti-Gr1 antibody for detecting neutrophils. A: Arterioles; B: bronchus; V: vein. Scale bar 50  $\mu$ m; objective magnification  $\times 20$ .

**(B) Effect of vagotomy on  $\alpha 7$  nAChR<sup>+</sup>Gr1<sup>+</sup> cells in *E. coli* infected lungs.** The lung sections were incubated with primary rabbit anti- $\alpha 7$  nAChR and rat-anti-Gr1 antibodies then labeled with Fluoro488-anti rabbit or Fluor-594 anti rat secondary antibodies. Red color: Gr1<sup>+</sup>; green color:  $\alpha 7$  nAChR<sup>+</sup>; objective magnification  $\times 40$ ; Scale bar 20  $\mu$ m.

#### Supplementary Figure 5

**Flow cytometry analysis of changes of  $\alpha 7$  nAChR<sup>+</sup>CD11b<sup>+</sup> cell population in peripheral blood from *E. coli*-infected sham, vagotomized and  $\alpha 7$  nAChR-agonist supplemented vagotomized mice.** Experimental setting was established in **Figure 4**. The blood cells were isolated and labeled with corresponding fluorescent antibodies. The whole cell population was divided into three gates: lymphocyte, monocyte, and PMN based on size and granularity of cells (**A**, **D**, **G**). The  $\alpha 7$  nAChR<sup>+</sup>CD11b<sup>+</sup> cells from each gate were subgated (**B**, **E**, **H**). The percentage of  $\alpha 7$  nAChR<sup>+</sup>CD11b<sup>+</sup> cells from each subgate was presented (**C**, **F**, and **I**). \*P < 0.05, one-way ANOVA with *Bonferroni post hoc* test. Data are presented as mean  $\pm$  SD.

#### Supplementary Figure 6

**Activation of  $\alpha 7$  nAChR promotes phosphorylation of p-AKT1 at Ser473 site in granulocytes and suppresses cytokine production.**

**A-B.** The wildtype and *Chrna7*<sup>-/-</sup> splenic neutrophils were pretreated with  $\alpha 7$  nAChR specific agonist-PHA568487 and then challenged them with LPS and separate cytoplasm and nucleus 1 h later. P-AKT1<sup>Ser473</sup> was measured in cytoplasm (**A**) and nucleus (**B**) by ELISA. **C.** The supernatant was collected to measure CXCL2 levels by ELISA in LPS-challenged splenic neutrophils pretreated with different concentration of PHA568487. Representative of two experiments. **D.** The splenic neutrophils were pretreated with Wortmannin for 15 min and then challenged with LPS. The

supernatant was collected to measure CXCL2 levels by ELISA 4 h later. N = 8 in each group. **\*\*P** < 0.01. **E.** The isolated splenic neutrophils were challenged with LPS (1  $\mu$ m). The supernatant was collected to measure CXCL2 and TNF- $\alpha$  levels by ELISA 4 h later. N = 3 in each group. **\*\*P** < 0.01, **\*P** < 0.05. Student's t test and data are presented as mean  $\pm$  SD.

### Supplementary Figure 7

**Deficiency of AKT1 worsens BAL profiles.** The wildtype and *Akt1*<sup>-/-</sup> mice were challenged with an IT *E. coli* ( $2.5 \times 10^6$  cfu). The mice were killed at 24 h after *E. coli* challenge. The BAL was collected to measure protein (**A**), *E. coli* colonies (**B**), and TNF- $\alpha$  level (**C**). N = 5 in each group. **\*P** < 0.05, Student's t test. Data are presented as mean  $\pm$  SD.

### Supplementary Figure 8

**Effect of deletion of Chrna7 and vagotomy on BAL profiles and splenic p-AKT1, p-STAT3 and p-ERK levels in E. coli pneumonia.** The wildtype, *Chrna7*<sup>-/-</sup>, and vagotomized mice were respectively challenged with an intratracheal *E. coli* ( $2.5 \times 10^6$  cfu). The mice were killed at 24 h after *E. coli* challenge. The BAL was collected and spleens were harvested and homogenized. The supernatant of BAL was used to measure protein (**A**); *E. coli* cfu (**B**); TNF- $\alpha$  (**C**). The p-AKT1<sup>Ser473</sup> (**D**), p-STAT3 (**E**) and p-ERK (**F**) levels in the supernatant of spleen homogenate were measured by ELISA. N = 4-5 in each group, **\*P** < 0.05, Student's t test. Data are presented as mean  $\pm$  SD.

### Supplementary Figure 9

**A-D. Deletion of Chrna7 or Akt1 worsens acute lung infection and inflammation.** The wildtype, *Chrna7*<sup>-/-</sup>, or *Akt1*<sup>-/-</sup> mice were respectively challenged with an intratracheal *E. coli* ( $2.5 \times 10^6$  cfu). The mice were killed at d1 and d2 after *E. coli* challenge to measure ELW (**A**). Blood was collected to analyze (**B**) blood neutrophils; (**C**) blood monocytes at d1. N = 4-5 in each group, **\*P** < 0.05, **\*\*P** < 0.01, student's t test. Data are presented as mean  $\pm$  SD. The lungs were harvested and homogenized to measure MPO activity in the supernatant at d1 (**D**). N = 5 in each group, **\*P** < 0.05, Repeated Measures of Two-way ANOVA. Data are presented as mean  $\pm$  SD.

**E. Change of survival in E. coli-infected wildtype, Akt1<sup>-/-</sup>, and Chrna7<sup>-/-</sup> mice.** The wildtype, *Akt1*<sup>-/-</sup>, and *Chrna7*<sup>-/-</sup> mice were IT challenged with *E. coli* ( $5 \times 10^6$  cfu) and followed up for 5 days. N = 10-23 in each group. Data are presented as mean  $\pm$  SD. Log-rank test.

### Supplementary Figure 10

**A-B. Flow cytometry analysis of splenic CD4<sup>+</sup> cells during *E. coli* pneumonia.** Using the same experimental setting as Fig. 7A-D, the four groups of spleen cells were submitted to flow cytometric analysis. **A.** lymphocyte population was gated. **B.** Percentage of splenic CD4<sup>+</sup> cells. N = 4 in each group, \**P* < 0.05. Data are presented as mean ± SD.

**C-D. p-AKT1 and CHAT expression in the *E. coli*-infected *Chrna7*<sup>-/-</sup>*Itgam*<sup>-/-</sup> spleens.** Spleens were collected from *E. coli*-infected wildtype and *Chrna7*<sup>-/-</sup>*Itgam*<sup>-/-</sup> mice to perform western blotting at 24 h post *E. coli* IT infection. N = 3-4 in each group, \**P* < 0.05. Data are presented as mean ± SD. Image J software was used for analyzing optical density.

### Supplementary Figure 11

**A-B. Effect of vagotomy and double deletion of *Chrna7* and *Itgam* on lung *Il22* and *Cxcl2* mRNA during *E. coli* pneumonia.** The sham, vagotomized, and *Chrna7*<sup>-/-</sup>*Itgam*<sup>-/-</sup> mice were IT challenged with *E. coli* (2.5 × 10<sup>6</sup> cfu). The wildtype mice receiving an IT PBS were used control. The mice were killed at 24 h after *E. coli* or PBS challenge. Lungs were excised to extract RNA for real-time PCR for *Il22* (**A**) and *Cxcl2* (**B**) mRNA. N = 3-4 in each group. Data are presented as mean ± SD.

**C-E. Effect of vagotomy and double deletion of *Chrna7* and *Itgam* on bone marrow monocytes and neutrophils during *E. coli* pneumonia.** The sham, vagotomized, and *Chrna7*<sup>-/-</sup>*Itgam*<sup>-/-</sup> mice were IT challenged with *E. coli* (2.5 × 10<sup>6</sup> cfu). The wildtype mice receiving an IT PBS were used control. The mice were killed at 24 h after *E. coli* or PBS challenge. BM cells were isolated and labeled with fluorescent anti-Ly6C and Ly6G antibodies. **C. Gating strategies for monocytes and neutrophils; D. Percentage of Ly6C<sup>hi</sup>Ly6G<sup>int</sup> monocytes; E. Percentage of Ly6C<sup>int</sup>Ly6G<sup>hi</sup> neutrophils.** N = 3-4 in each group. Data are presented as mean ± SD.

### Supplementary Figure 12

**TNF-α production in LPS-challenged peritoneal macrophages.** Peritoneal macrophages were isolated from wildtype, *Chrna7*<sup>-/-</sup>, *Itgam*<sup>-/-</sup>, and *Chrna7*<sup>-/-</sup>*Itgam*<sup>-/-</sup> mice. The mice were ip injected with 3 ml of 3% (w/v) Brewer thioglycollate medium into the peritoneal cavity. Peritoneal lavage was performed 3 days post thioglycollate injection. The purified wildtype, *Chrna7*<sup>-/-</sup>, *Itgam*<sup>-/-</sup>, and *Chrna7*<sup>-/-</sup>*Itgam*<sup>-/-</sup> macrophages were separately challenged with LPS (1 μM) for 4 h. TNF-α in the supernatant of media was measured by ELISA. N = 3 in each group. Data are presented as mean ± SD.

### **Supplementary Figure 13**

**Vagal- $\alpha 7$  nAChR signals via AKT1 regulate  $\alpha 7$  nAChR<sup>+</sup>CD11b<sup>+</sup> cells by which dampen acute lung inflammatory responses.** In the intact condition, vagus signals trigger release of acetylcholine in the spleen, and this event leads to phosphorylation of AKT1 in  $\alpha 7$  nAChR<sup>+</sup>CD11b<sup>+</sup> cells and confines these cells in the spleen. Disruption of vagal circuits reduces phosphorylation of AKT1 in splenic  $\alpha 7$  nAChR<sup>+</sup>CD11b<sup>+</sup> cells and facilitates spleen egress and lung recruitment of these cells. Without functional vagal circuits or  $\alpha 7$  nAChR agonist stimulation, accumulated  $\alpha 7$  nAChR<sup>+</sup>CD11b<sup>+</sup> cells in the LPS or *E. coli* challenged lung lack of anti-bacterial propriety and propagate inflammatory responses.

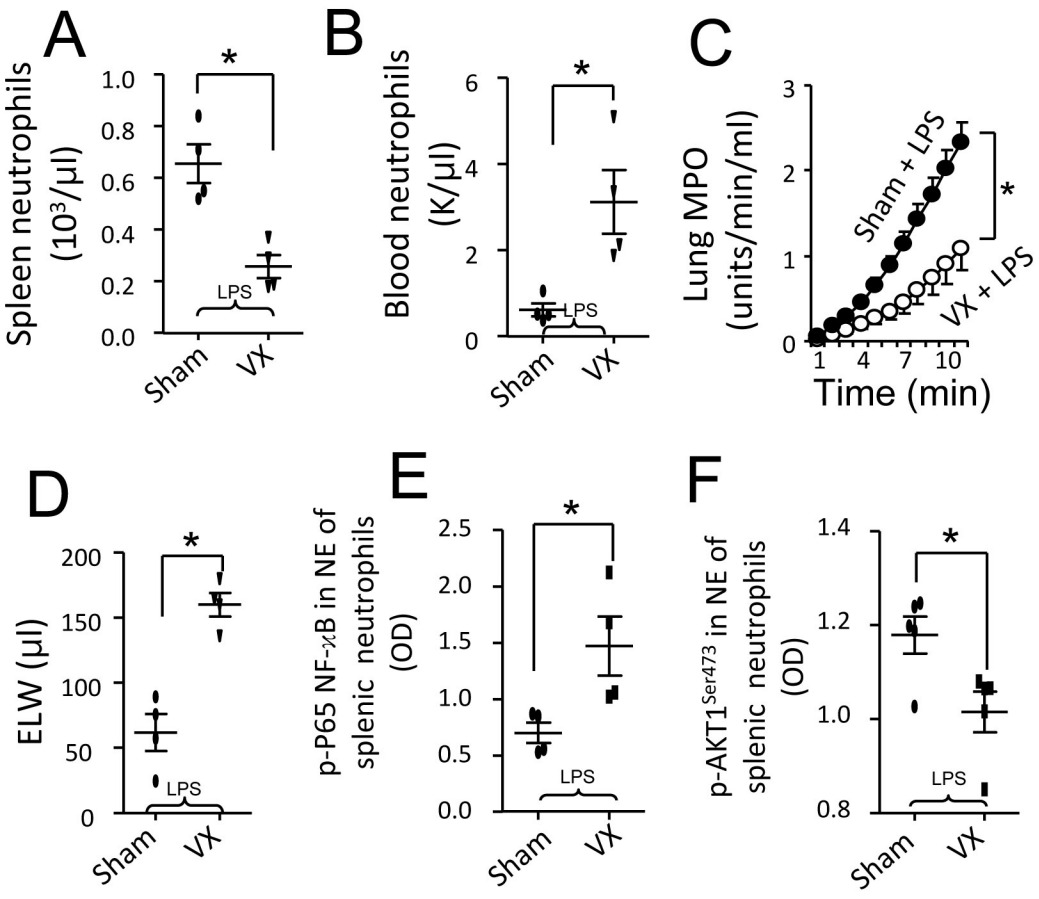

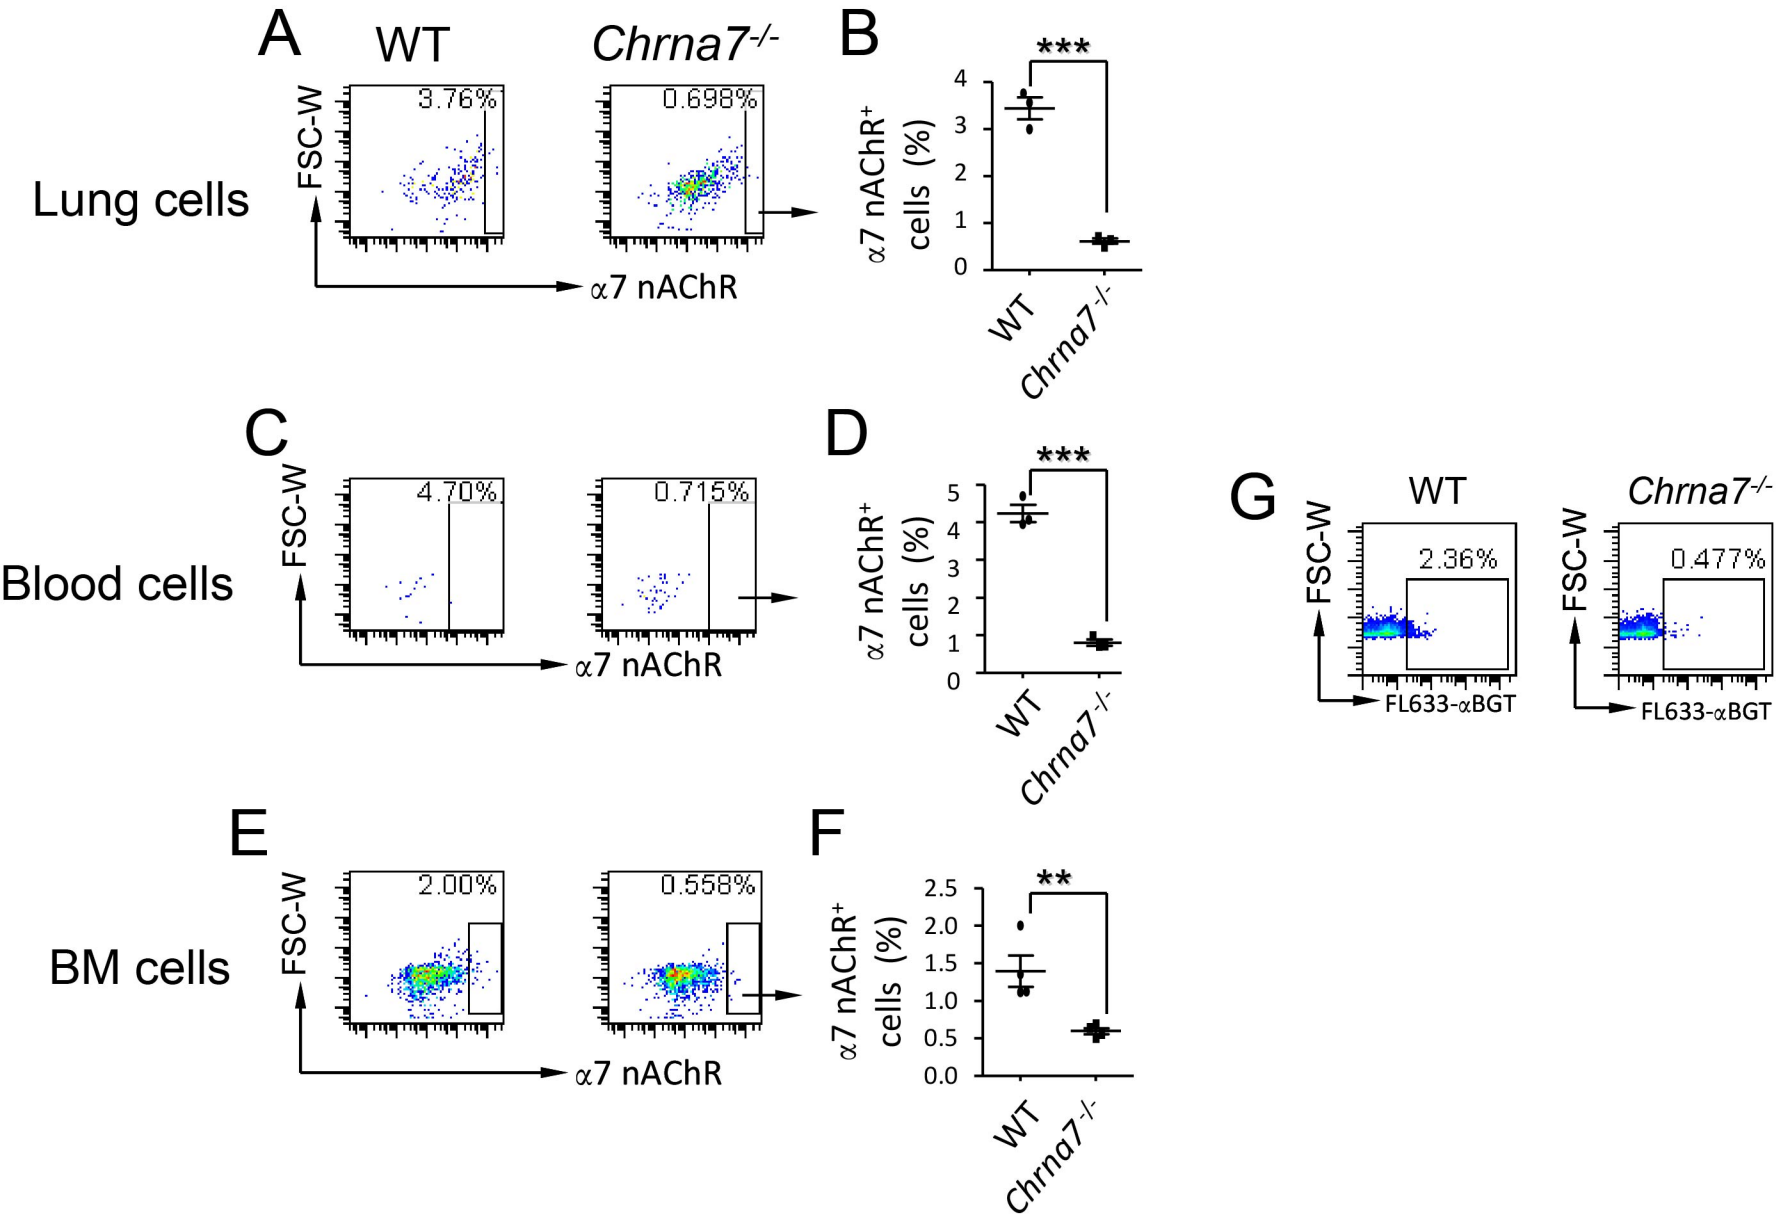

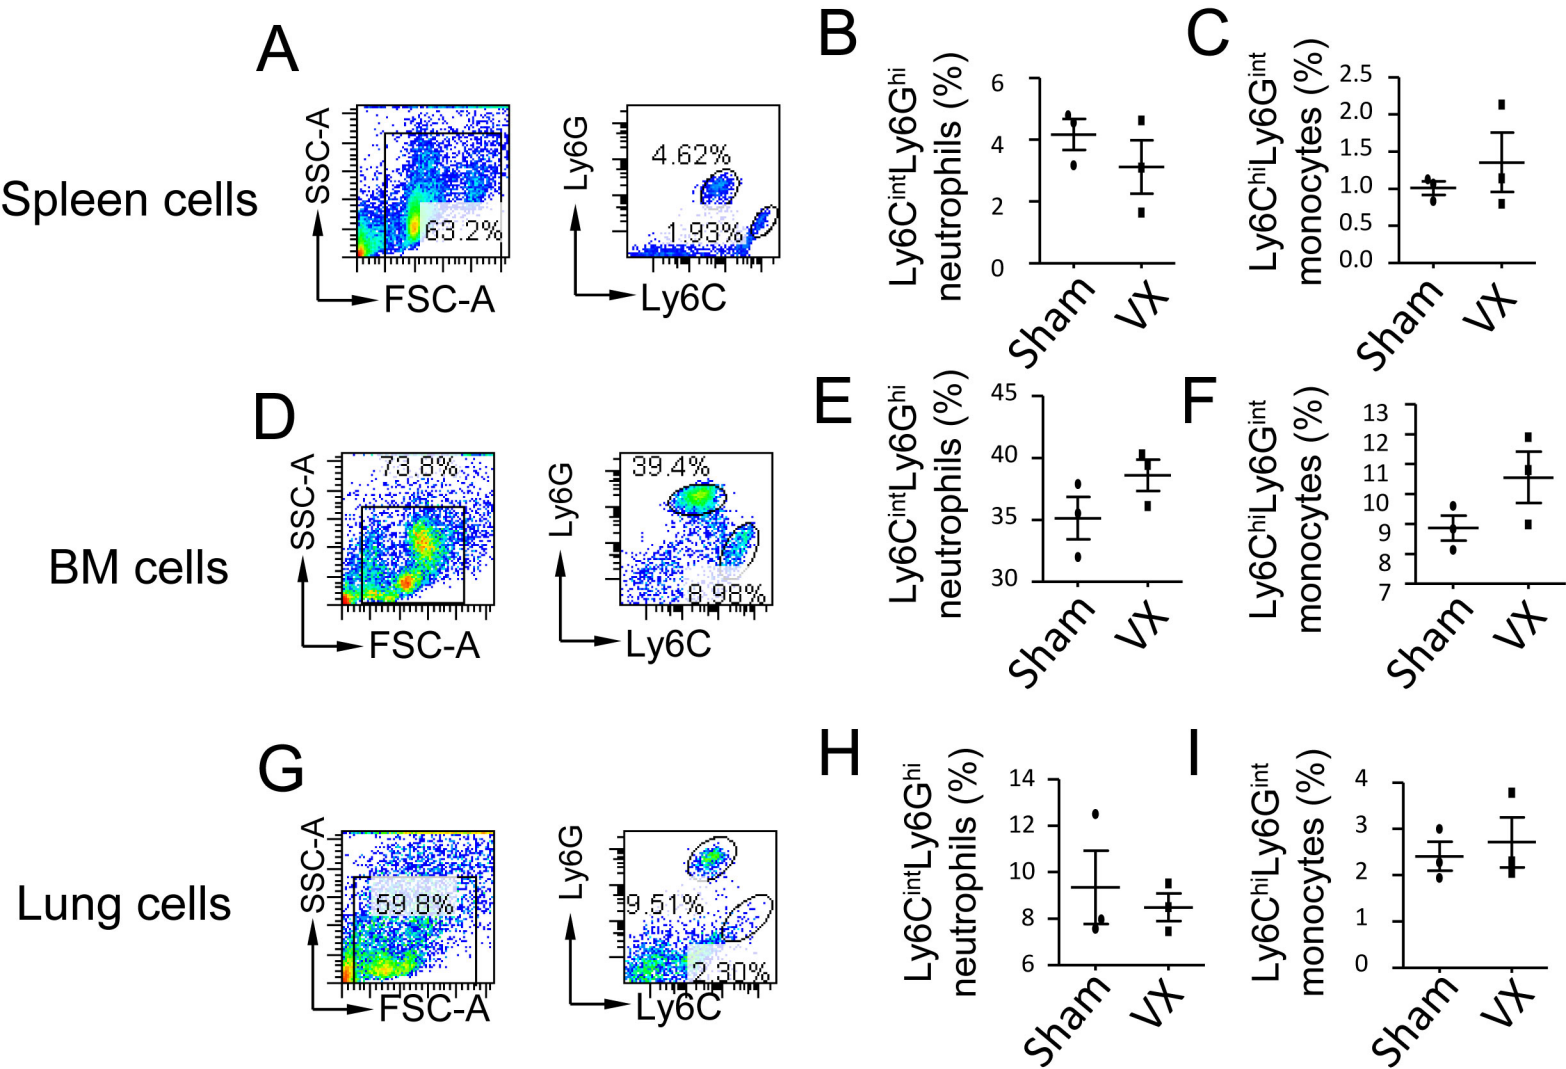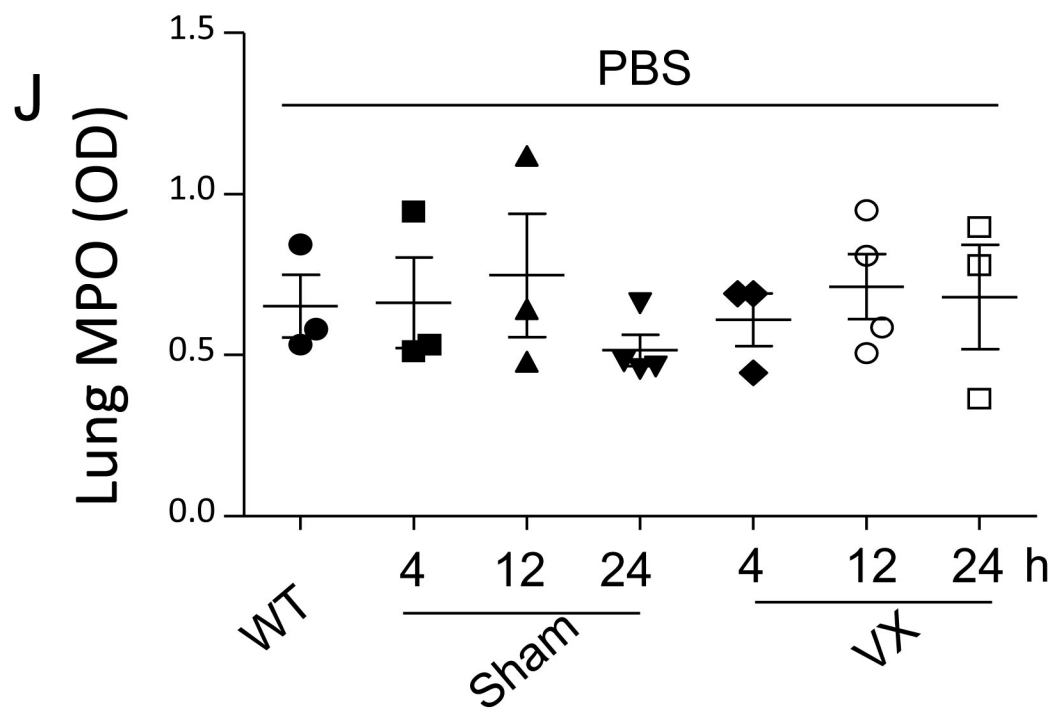



VE-cadherin/ $\alpha 7$ nAChR

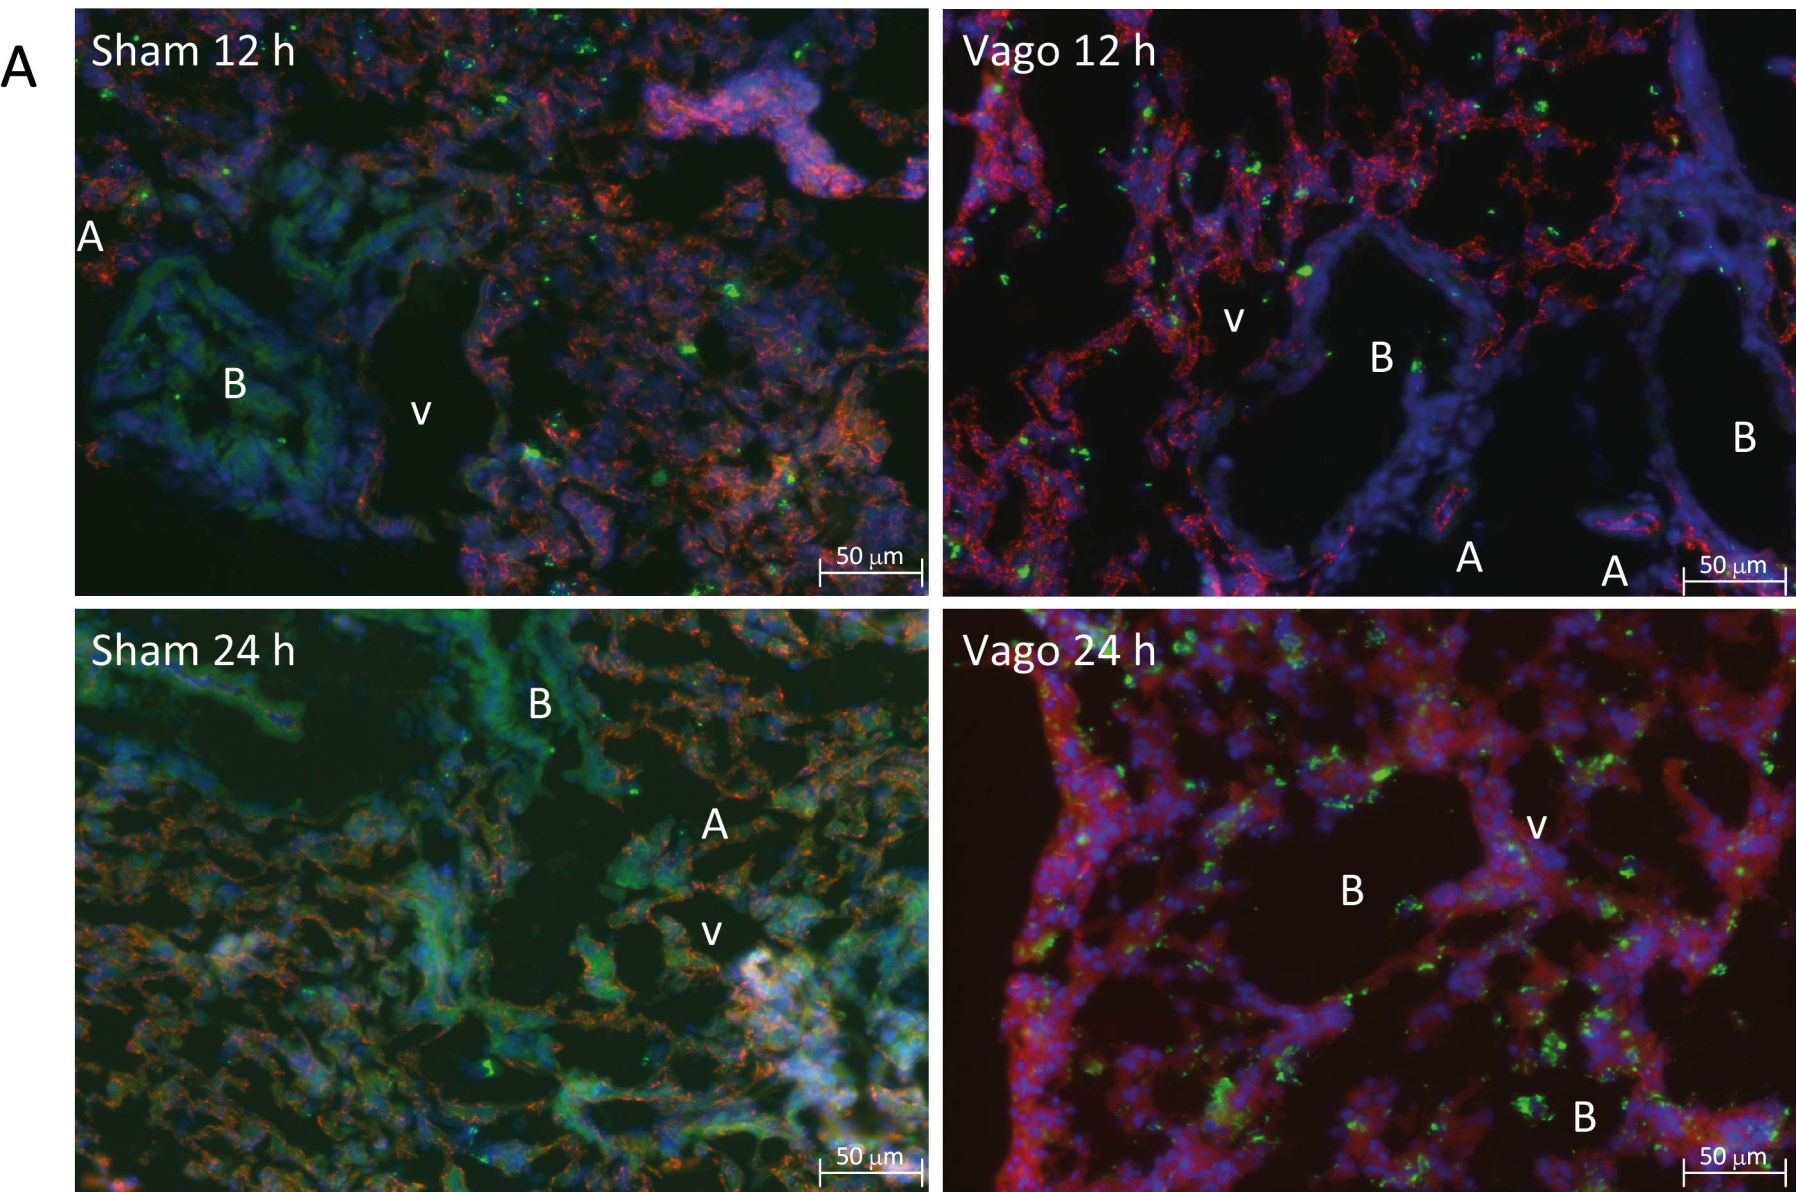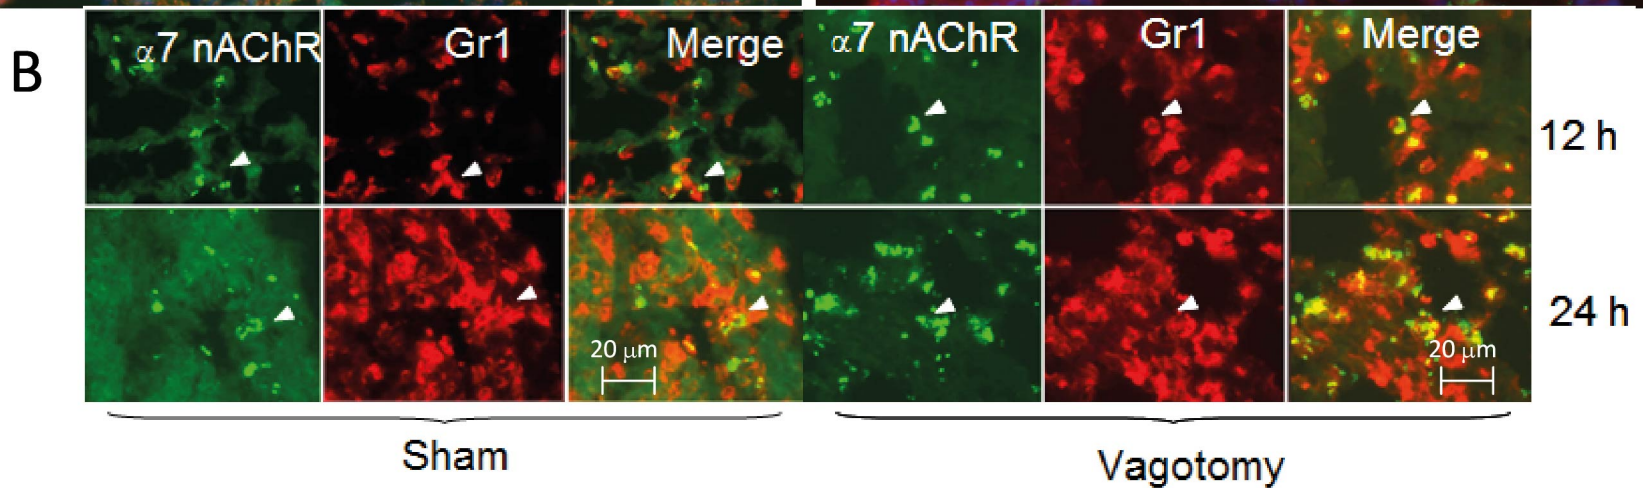

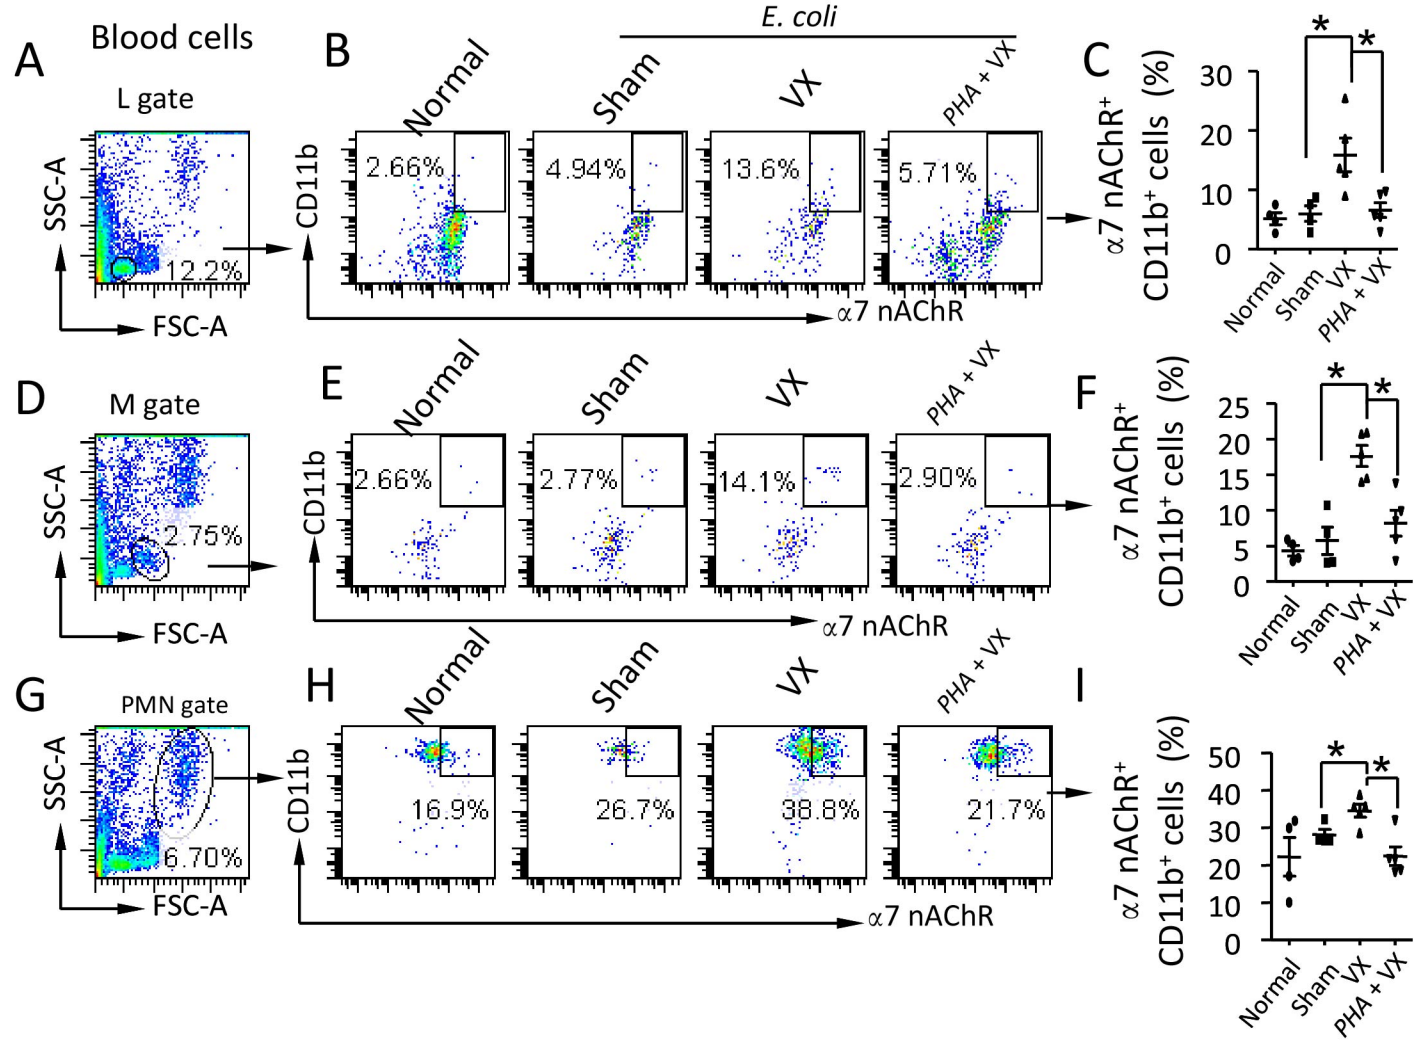

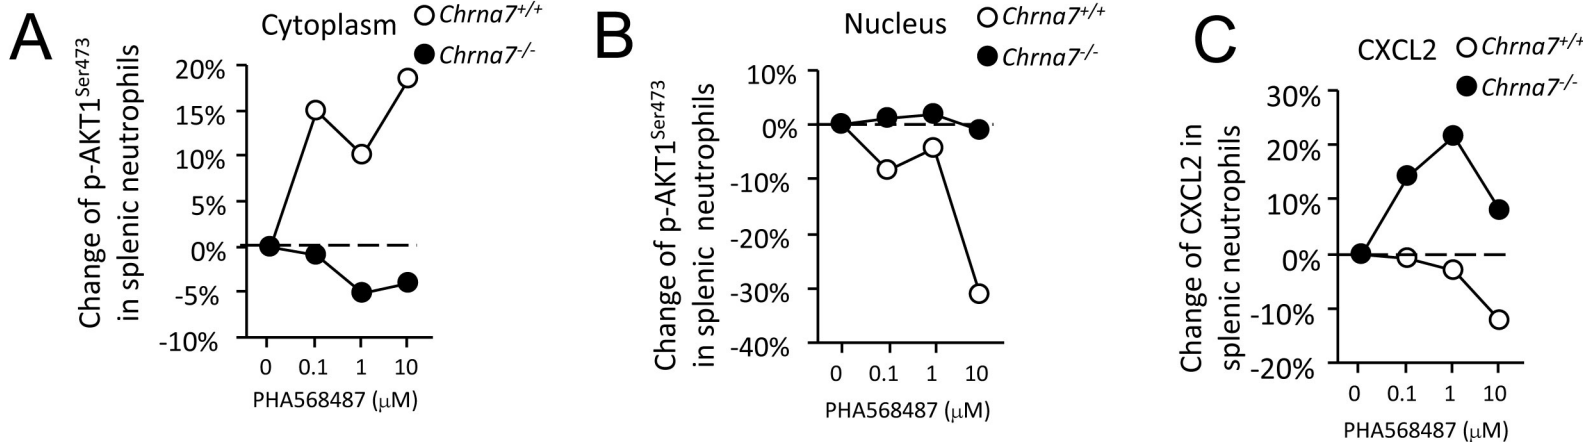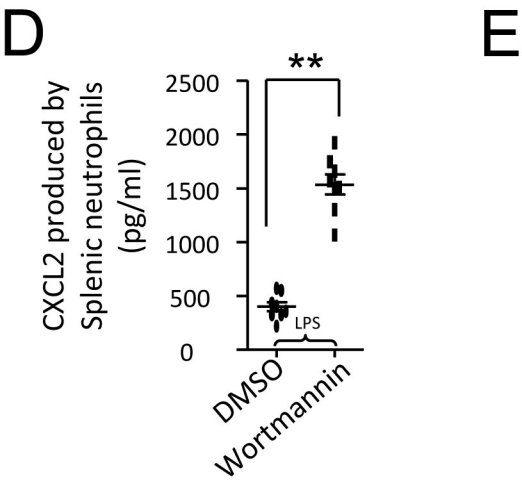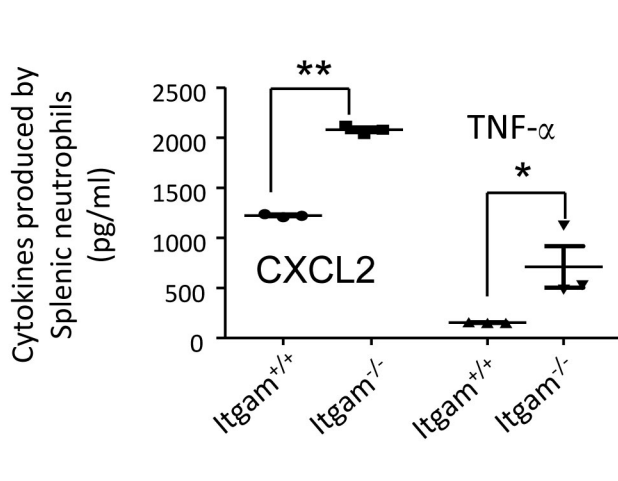

**A**

BAL protein (mg/ml)

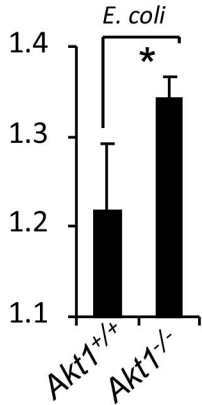**B**BAL *E. coli* $(\times 10^3 \text{ cfu/ml})$ 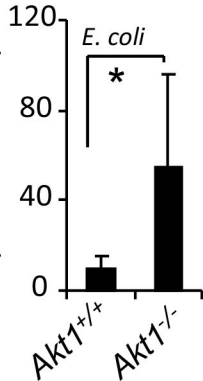**C**BAL TNF- $\alpha$  $(\times 10^3 \text{ pg/ml})$ 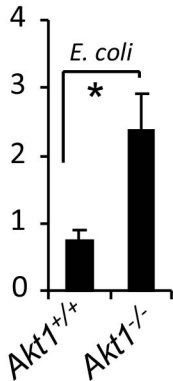

**A**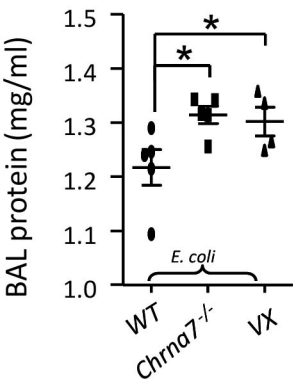**B**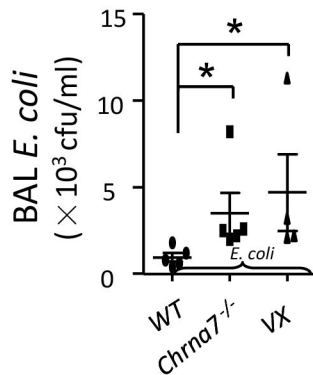**C**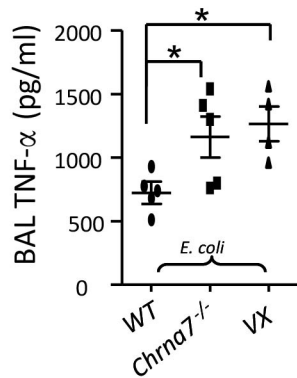**D**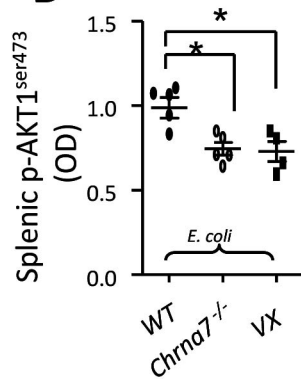**E**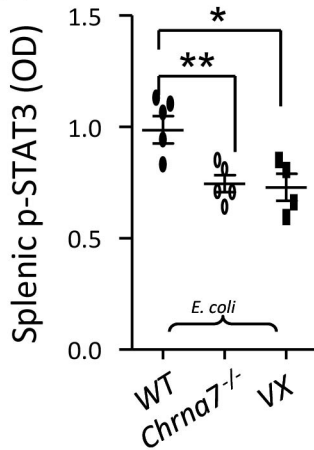**F**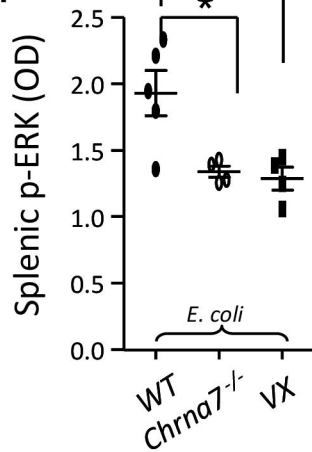

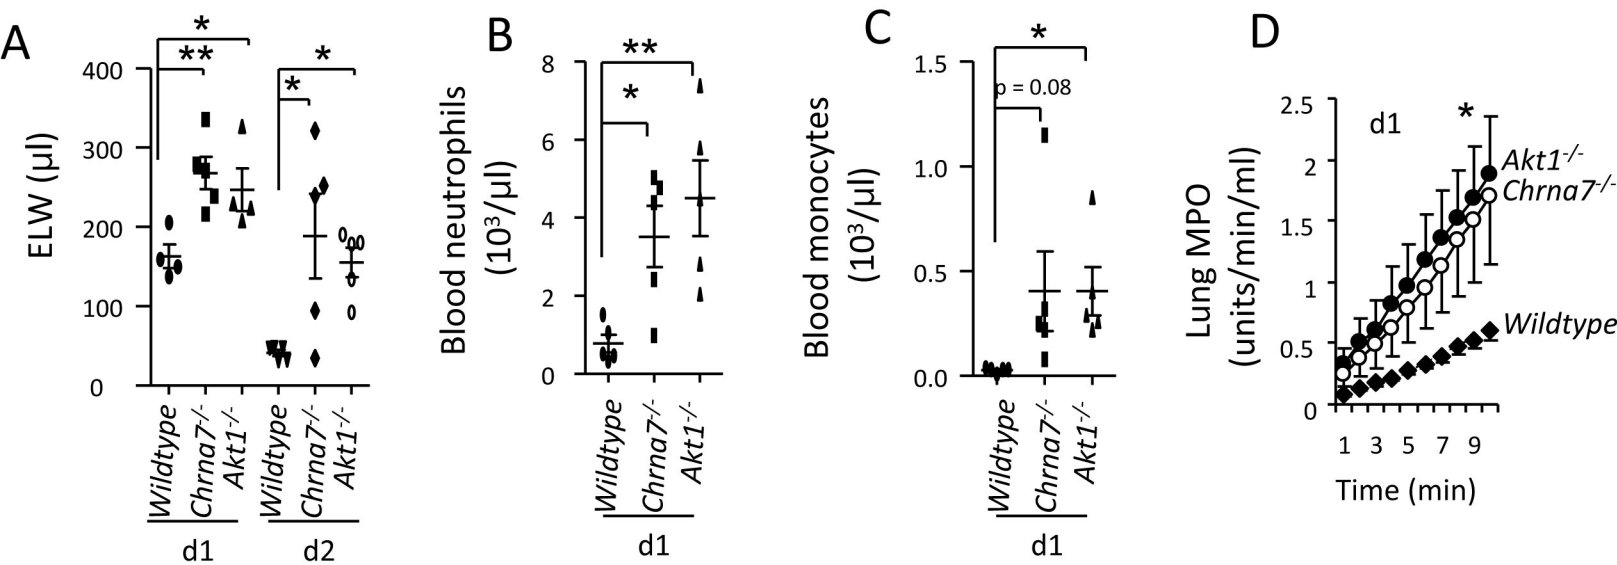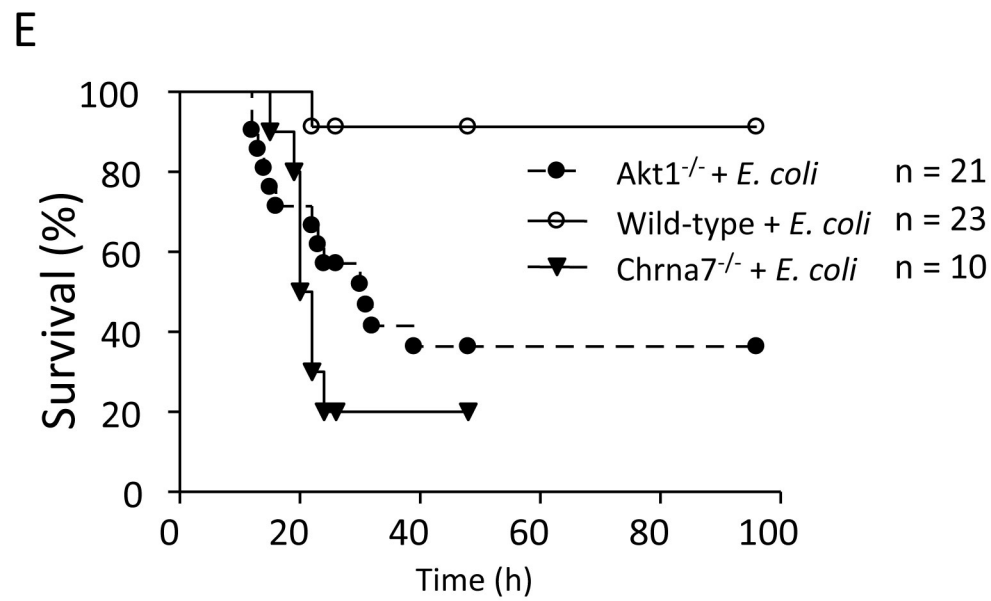

TNF- $\alpha$  levels  
(pg/ml)

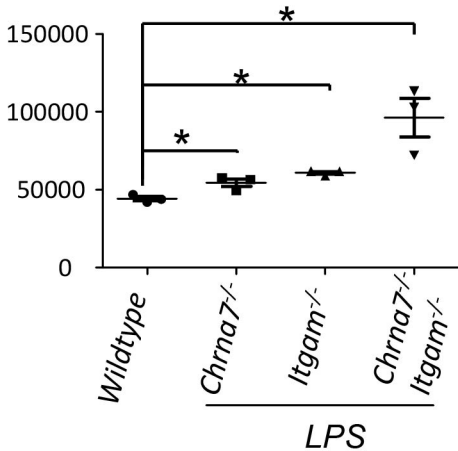

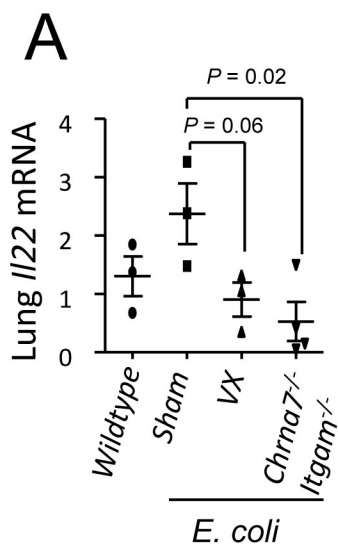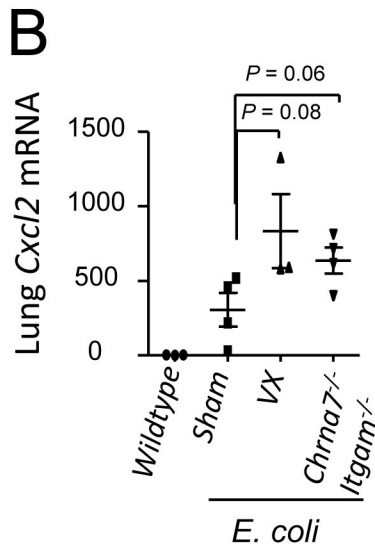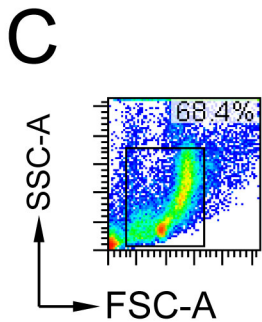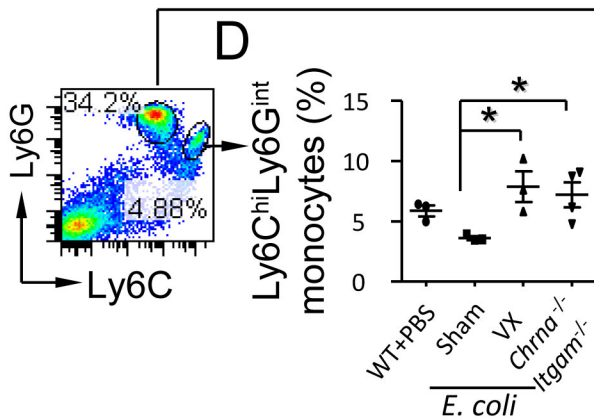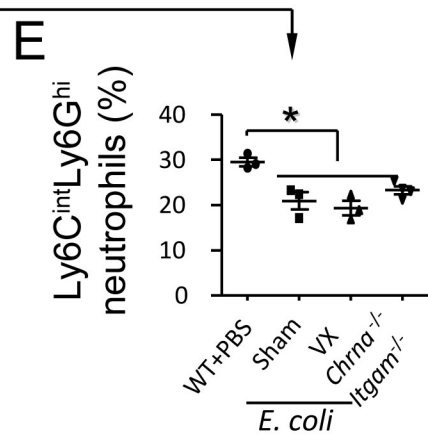



TNF- $\alpha$  levels  
(pg/ml)

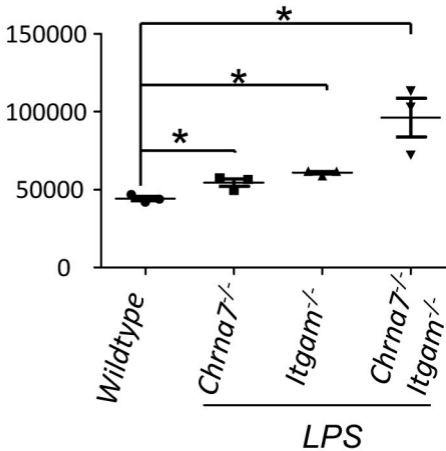

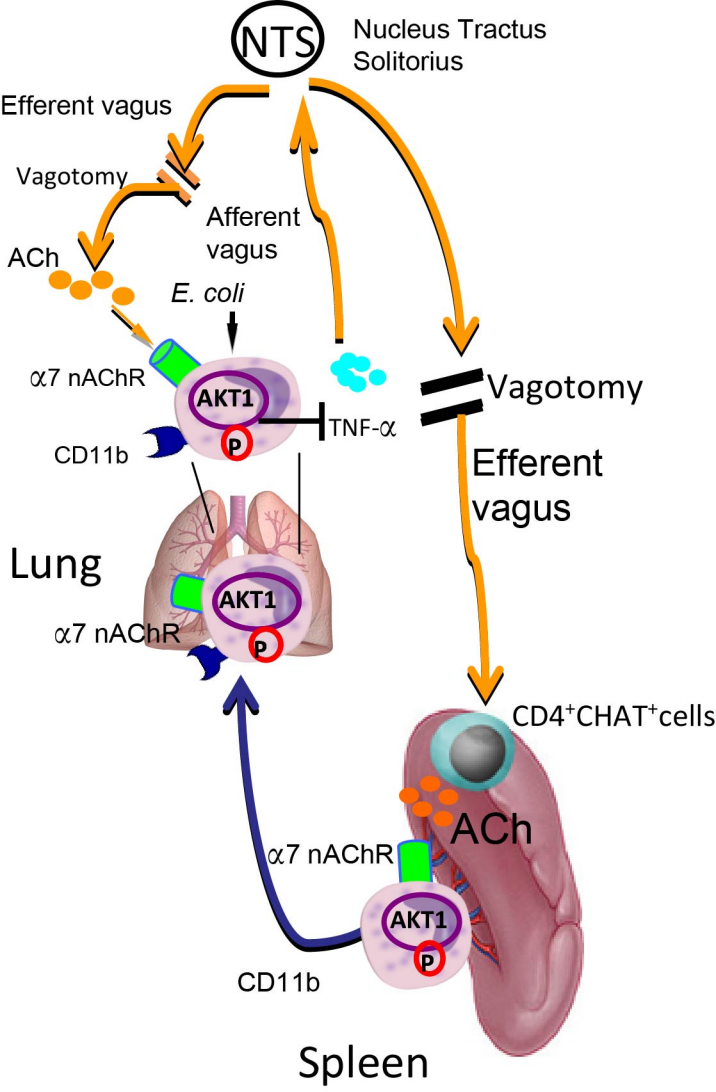

Supplement: celldisc20179-s1.pdf [file celldisc20179-s1.pdf]
